# Supplementary material
Source: PubMed Central journal article supplement (PMC2887564)
Supplement: supp_90_5_1238__1.pdf [file supp_90_5_1238__1.pdf]

**Supplementary Table S1.** List of RT-PCR primers

| Primer*     | Sequence (5'-3')                                                          |
|-------------|---------------------------------------------------------------------------|
| A 101-82    | GGCTAGCGCCTCCACCCTTTCTCTCAA                                               |
| B 5141-5121 | CTTAACAGGGAAGAATCCATG                                                     |
| C 4969-4950 | TGGAGCAGGATGTAAAGGTA                                                      |
| D 4230-4247 | GCCCAGCACACATGTGTC                                                        |
| E 2831-2853 | GTATCTGAGACTTGGGAAGAGCA                                                   |
| F 2645-2665 | CGGATCCTGCTTTAAACAGGTGCTTTTA                                              |
| FLAGT       | GCAAAAATGGATAAAGTT <u>GATTACAAGGATGACGACGATAAGCTTAACAGG</u><br>GAAGAATCC† |

\*Numbering of primers is based on the Dunlop strain, GenBank accession number V01108.

†Underlined sequence indicates the position of the FLAG tag.
